# Supplementary material for: Realization of a self-powered Cu2O ozone gas sensor through the lateral photovoltaic effect
Source: Royal Society of Chemistry journal article supplement (doi:10.1039/d2tc03856k), 2022-01-01
Supplement: d2tc03856k1.pdf [file d2tc03856k1.pdf]

## Supporting information

# Realization of a Self-powered Cu<sub>2</sub>O Ozone Gas Sensor through the Lateral Photovoltaic Effect

*Chun-Ying Huang\**, *Xin-Rong He* and *Ting-Yu Dai*

Department of Applied Materials and Optoelectronic Engineering, National Chi Nan University,  
Nantou 54561, Taiwan

\*Corresponding author. E-mail: [cyhuang0103@ncnu.edu.tw](mailto:cyhuang0103@ncnu.edu.tw)

## Supporting figures

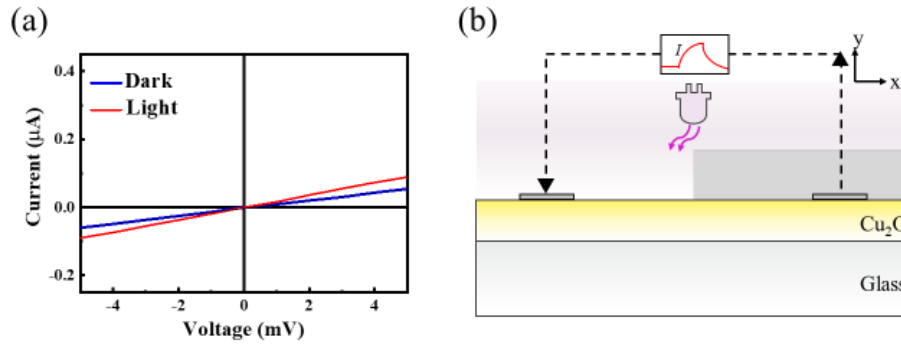

**Figure S1.** (a)  $I$ - $V$  characteristics and (b) schematic diagram of the device structure for Pt/Cu<sub>2</sub>O/Pt under asymmetrical light illumination.

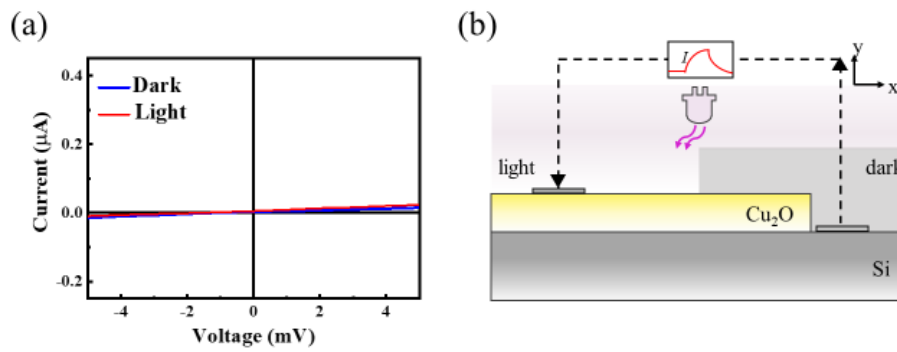

**Figure S2.** (a)  $I$ - $V$  characteristics and (b) schematic diagram of the device structure for Pt/Cu<sub>2</sub>O/Si/Pt under asymmetrical light illumination.
